# Supplementary material for: The structure of personality in Parkinson’s disease and the effects of age, years since diagnosis, and impulsivity
Source: PeerJ. 2026 Feb 19;14:e20725. doi: 10.7717/peerj.20725 (PMC12925408; doi:10.7717/peerj.20725)
Supplement: Supplemental Information 1 [file peerj-14-20725-s001.xlsx]

## Sheet: Dataset_Completo_all_Participan
Progress	Condition	Gender	PD_Age	Year_since_Dx	Age_Diagnosis	Education	HE_H_01_r	HE_E_01_r	HE_X_01	HE_A_01_r	HE_C_01	HE_O_01	HE_H_02_r	HE_E_02	HE_X_02_r	HE_A_02	HE_C_02	HE_O_02_r	HE_H_03_r	HE_E_03	HE_X_03	HE_A_03_r	HE_C_03	HE_O_03_r	HE_H_04	HE_E_04_r	HE_X_04	HE_A_04_r	HE_C_04_r	HE_O_04	HE_H_05_r	HE_E_05_r	HE_X_05_r	HE_A_05	HE_C_05_r	HE_O_05	IPSA	HE_H_06	HE_E_06	HE_X_06_r	HE_A_06	HE_C_06_r	HE_O_06	HE_H_07	HE_E_07	HE_X_07	HE_A_07_r	HE_C_07_r	HE_O_07_r
100	PD	F	79	8	71	5	1	2	2	3	2	4	1	6	1	2	6	1	1	4	3	2	5	1	6	1	4	2	3	6	1	2	2	5	2	3	1	6	6	2	2	1	4	6	5	2	2	2	1
100	PD	M	74	13	61	5	1	6	5	1	6	7	1	4	1	6	6	1	1	5	7	1	7	2	2	1	4	1	1	7	1	1	5	7	1	7	1	7	5	6	7	1	6	7	2	7	1	2	1
100	PD	F	79	6	73	5	5	4	6	2	5	7	1	6	1	3	2	1	1	4	5	2	2	2	6	1	4	2	3	6	1	2	2	5	1	5	2	6	7	6	5	2	6	6	3	2	1	2	1
63	PD	F	63	10	53	2	4	7	6	1	7	1	1	7	1	7	7	1	1	7	7	1	7	1	7	4	1	1	7	7	1	5	1	7	7	7	1	7	7	1	7	1	7	7	4	7	1	1	1
100	PD	F	63	3	60	5	4	3	1	4	7	2	1	7	3	5	7	7	1	7	5	5	7	5	4	1	1	4	1	4	2	1	3	3	3	3	1	5	6	3	1	2	4	6	4	4	4	1	3
100	PD	M	71	10	61	4	2	3	2	3	2	4	1	3	2	2	4	1	1	3	3	2	3	1	7	3	3	1	2	3	1	3	3	2	5	5	1	7	3	3	2	1	6	7	3	2	3	1	2
100	PD	F	70	8	62	5	1	1	4	1	2	5	1	5	4	5	4	1	2	6	6	1	4	1	5	1	3	1	1	6	1	1	3	5	2	2	1	7	7	6	2	5	4	7	5	5	1	3	1
100	PD	M	64	3	61	3	1	1	1	1	4	5	1	6	1	5	7	3	1	3	3	2	4	7	7	3	1	1	1	5	1	3	4	7	4	7	1	5	6	5	3	2	5	7	4	3	5	1	2
100	PD	F	69	9	60	3	1	5	5	3	5	5	1	5	1	2	6	1	1	3	7	1	5	4	6	2	6	2	2	5	1	2	3	5	3	5	1	6	5	3	6	3	2	7	2	7	1	2	5
100	PD	M	61	1	60	2	1	2	3	1	4	4	2	3	4	4	3	5	1	4	3	1	3	4	5	2	4	1	4	4	2	3	3	2	3	2	1	4	3	4	3	4	2	6	4	3	1	2	5
100	PD	M	74	16	58	4	1	6	6	1	6	5	2	7	2	3	7	2	1	5	6	6	2	1	4	1	6	2	5	5	1	1	1	3	1	5	1	5	2	1	5	3	5	7	1	6	1	5	2
100	PD	F	55	2	53	3	1	7	5	1	7	7	1	6	1	4	7	1	1	4	7	1	5	4	7	1	7	1	1	7	1	1	1	5	4	6	1	7	6	5	5	2	5	7	4	7	1	3	1
100	PD	M	78	8	70	5	2	4	5	1	2	6	1	6	1	6	6	2	1	5	5	1	5	5	6	5	5	1	5	6	1	4	1	5	3	2	1	7	5	3	7	2	6	7	2	5	1	2	3
100	PD	F	64	6	58	2	1	5	5	1	6	7	1	5	6	6	5	1	1	4	6	1	6	4	7	3	6	5	2	5	1	4	5	5	2	4	1	7	4	5	6	1	5	7	2	6	1	1	1
100	PD	F	70	4	66	3	1	5	7	5	1	7	1	4	1	6	7	5	1	1	7	1	6	6	7	1	7	1	1	5	1	1	1	6	2	5	1	7	5	4	6	2	2	7	2	7	1	1	1
100	PD	M	69	3	66	3	1	5	1	5	5	2	1	6	6	3	6	5	1	6	4	5	6	3	1	2	2	2	5	5	1	6	6	5	5	5	1	7	7	6	3	6	1	6	4	4	1	7	3
100	PD	M	60	5	55	3	1	4	3	1	4	5	1	6	3	7	5	2	1	2	2	1	6	4	7	1	2	2	2	7	2	4	5	7	4	6	1	7	5	5	5	2	3	7	2	5	1	2	2
57	PD	F	59	1	58	2	1	2	2	1	7	1	1	7	1	3	6	2	1	2	2	1	2	2	2	1	2	1	2	2	1	2	2	2	1	2	1	7	7	2	2	1	2	2	2	2	1	1	2
57	PD	M	82	8	74	5	4	3	3	3	4	6	1	5	2	2	6	1	1	2	1	2	6	5	5	2	2	3	3	4	1	4	5	5	6	4	1	7	6	7	6	2	6	7	4	5	1	2	5
100	PD	M	68	2	66	5	2	5	2	2	7	6	2	5	2	7	5	1	1	5	4	4	6	2	4	6	4	4	4	6	3	5	5	4	4	3	2	5	5	4	4	2	6	6	4	5	2	2	5
100	PD	M	73	14	59	3	5	3	3	5	4	5	3	6	4	3	5	3	1	5	5	3	5	4	6	1	4	3	3	3	6	2	2	3	5	3	1	2	6	5	4	3	3	6	5	4	3	2	3
100	PD	F	63	20	43	5	7	7	7	1	7	7	3	1	3	3	6	1	2	1	3	1	6	1	3	3	3	1	2	3	3	7	1	1	3	1	2	7	7	3	3	3	7	5	1	1	3	7	1
100	PD	F	69	2	67	5	1	4	5	3	5	7	1	3	2	4	4	1	1	2	5	3	4	3	6	4	5	2	3	6	1	3	2	6	3	6	1	6	4	3	4	2	6	7	4	6	3	2	4
60	PD	F	73	3	70	5	1	4	5	1	7	6	1	5	1	6	7	7	1	4	5	1	7	3	7	1	5	1	2	6	1	1	2	7	3	4	1	7	4	4	4	1	6	7	2	5	1	1	2
100	PD	F	54	4	50	5	1	7	4	1	5	4	1	1	3	7	4	2	1	4	4	1	4	4	7	1	4	1	1	5	1	1	3	5	1	4	1	7	4	4	4	1	4	7	1	4	1	1	1
100	PD	M	66	17	49	3	4	5	5	2	4	5	2	6	1	3	4	2	2	5	5	2	3	2	3	2	5	2	3	4	1	4	2	3	3	4	2	5	4	3	2	4	1	5	3	6	2	4	3
63	PD	M	66	17	49	3	5	5	6	3	5	4	2	6	2	4	5	4	6	6	7	2	4	2	4	2	6	3	4	4	1	5	1	3	3	4	2	6	5	3	3	2	2	5	4	5	2	3	4
100	PD	M	55	6	49	5	5	4	3	5	6	6	2	3	5	3	4	1	1	5	2	5	5	5	5	6	2	4	1	6	1	5	5	4	5	5	3	5	4	3	1	1	5	5	4	2	5	3	1
100	PD	F	79	9	70	3	1	5	5	4	7	5	3	7	4	2	6	3	1	5	5	3	5	3	7	3	4	2	2	4	3	4	5	3	2	4	2	5	7	4	5	2	4	6	3	4	2	2	3
100	PD	F	71	8	63	5	1	3	3	4	3	6	2	6	5	4	4	5	6	6	5	3	2	2	6	2	6	3	6	5	1	3	4	6	6	5	2	7	6	3	5	5	2	7	6	6	2	3	2
100	PD	M	61	2	59	3	1	5	4	1	5	7	1	7	5	2	3	1	1	6	3	4	6	2	1	1	3	4	4	7	1	1	7	2	2	6	1	5	7	7	7	2	5	5	5	4	1	7	1
100	PD	M	51	1	50	5	4	3	3	5	4	6	2	5	2	3	4	2	1	3	4	4	4	2	4	2	4	4	4	4	2	3	2	3	4	4	2	5	4	2	3	3	3	4	4	4	2	3	1
100	PD	F	47	3	44	2	1	4	3	1	5	1	1	5	6	4	6	7	1	4	2	2	6	5	7	2	2	1	1	3	1	4	6	6	4	1	1	7	5	5	7	1	4	7	6	3	1	1	5
100	PD	F	45	3	42	5	1	2	4	3	4	5	1	5	5	2	4	1	1	6	3	6	5	5	5	1	2	4	4	5	3	2	5	3	5	2	1	7	5	5	2	3	4	5	5	2	2	3	4
100	PD	F	71	13	58	3	1	4	7	1	5	6	1	5	1	4	7	1	1	5	7	1	3	4	7	1	4	1	4	7	2	2	2	7	4	7	1	7	4	3	7	5	4	7	7	7	2	2	1
100	PD	F	52	10	42	4	1	5	6	1	4	5	2	2	2	3	6	2	7	5	6	3	6	4	3	6	6	2	4	6	2	4	5	6	6	6	2	6	4	2	6	3	4	6	6	6	2	4	1
63	PD	F	60	2	58	3	1	3	3	1	4	7	1	6	5	4	6	4	1	5	3	3	2	4	4	2	2	2	5	3	4	2	6	7	5	3	2	3	7	5	4	4	5	3	6	6	1	5	6
100	PD	F	64	6	58	4	1	5	3	2	5	6	1	7	1	3	7	1	1	4	2	1	6	2	7	1	3	2	1	4	1	1	5	4	5	4	1	6	6	5	2	5	4	6	2	3	4	2	5
100	PD	M	72	3	69	3	3	7	4	3	7	6	1	4	2	5	6	1	2	1	4	1	5	2	5	3	4	1	1	5	1	3	3	4	1	5	1	6	2	4	6	1	6	6	2	4	1	1	3
63	PD	M	46	6	40	3	3	4	5	3	4	4	3	5	4	4	4	2	3	4	3	4	4	4	4	2	4	3	4	4	3	3	4	5	4	4	2	4	4	4	5	4	3	4	4	4	2	3	3
100	PD	F	60	4	56	3	2	5	2	2	5	4	2	6	5	6	6	1	1	4	1	1	5	4	7	1	1	1	3	6	1	4	6	6	3	3	1	7	6	6	5	2	4	7	3	2	1	2	1
100	PD	F	66	6	60	3	1	2	3	2	3	5	1	7	3	2	4	3	1	5	4	2	5	5	6	2	5	2	4	3	1	4	4	5	5	5	1	6	6	4	1	2	3	7	6	5	1	2	3
100	PD	F	54	3	51	3	1	7	4	1	4	7	1	6	1	4	7	1	1	7	7	1	7	1	7	2	4	1	1	7	1	5	4	4	3	5	1	7	5	4	6	1	4	7	1	5	1	1	1
100	PD	M	71	17	54	5	1	5	5	1	7	6	1	5	2	5	6	5	1	2	5	1	6	4	6	3	3	1	2	6	1	3	3	6	2	5	1	7	5	5	6	3	3	7	4	5	1	2	5
100	PD	M	63	14	49	3	1	5	5	1	6	6	1	5	1	6	5	1	1	1	5	1	5	5	4	2	6	1	4	6	1	4	1	6	4	6	1	6	3	4	6	3	5	5	2	6	1	2	1
100	PD	M	50	8	42	3	1	6	6	2	6	3	1	7	1	4	5	2	1	1	4	2	5	2	6	2	4	2	1	5	2	4	2	4	1	6	1	7	4	3	6	2	4	7	2	7	1	2	1
73	PD	F	67	15	52	3	1	1	1	7	7	7	1	7	1	7	7	1	1	7	7	1	7	7	7	1	1	1	1	7	1	7	1	7	1	7	1	7	7	7	7	1	7	7	7	7	1	1	1
100	PD	F	53	1	52	3	1	3	4	4	6	4	1	7	3	7	6	4	1	3	2	1	7	3	7	1	3	1	1	5	1	1	5	5	2	3	1	6	7	5	7	2	7	7	4	4	1	1	5
100	PD	F	50	5	45	6	3	6	4	3	2	5	2	3	2	3	6	2	2	3	3	3	5	2	3	1	4	1	2	5	1	4	1	5	5	4	1	4	2	2	4	5	5	5	3	5	1	3	4
100	PD	F	62	3	59	3	3	5	1	3	3	5	1	5	1	5	5	1	1	5	5	3	5	3	7	3	3	2	5	2	3	3	3	3	3	1	2	6	5	5	3	4	5	7	5	4	4	4	5
100	PD	M	54	9	45	2	1	4	3	2	3	6	1	7	1	7	4	1	1	4	1	1	7	1	7	1	1	2	3	5	1	1	1	7	5	5	1	7	4	7	2	2	1	7	4	2	1	3	1
100	PD	F	70	3	67	2	1	3	2	1	7	2	1	6	5	3	6	2	1	7	4	1	6	6	7	5	6	1	1	6	1	1	6	6	1	6	1	6	6	6	6	1	1	7	4	7	1	1	6
100	PD	F	70	4	66	3	1	4	4	1	3	7	1	2	1	3	6	1	1	2	3	1	3	1	5	1	3	1	2	7	1	1	2	3	3	4	1	7	2	1	3	2	4	7	1	3	1	2	1
100	PD	M	59	1	58	3	1	7	7	1	7	7	1	5	1	7	7	1	1	2	7	1	7	1	7	1	7	1	1	7	1	1	1	7	1	7	1	7	1	1	7	1	7	7	1	7	1	1	1
100	PD	M	71	8	63	2	1	5	5	1	4	2	1	6	2	7	5	6	1	5	2	1	5	5	7	2	2	1	5	2	1	1	5	7	3	4	1	7	3	6	7	4	1	7	6	5	1	1	6
100	PD	F	69	3	66	2	1	5	5	1	4	1	1	2	1	4	5	1	1	1	4	1	4	2	5	1	1	1	1	2	1	1	1	3	1	2	1	5	2	1	4	1	2	5	1	5	1	1	1
57	PD	F	69	3	66	2	1	4	5	1	5	4	1	3	1	5	5	1	1	1	4	1	4	3	5	1	1	1	1	3	1	1	1	3	2	4	1	5	2	1	4	1	4	6	1	5	1	1	1
100	PD	M	70	23	47	8	1	1	2	1	4	4	1	6	1	6	5	4	1	5	5	4	4	4	7	4	2	1	5	4	4	4	2	4	3	2	2	4	6	5	4	5	2	7	6	2	1	1	5
100	PD	M	46	8	38	3	1	4	4	1	3	6	3	5	4	7	5	1	2	4	3	1	3	4	3	4	3	1	5	7	2	3	5	7	4	6	1	4	7	7	7	3	3	3	2	5	1	4	1
100	PD	F	60	7	53	3	1	5	4	1	3	3	2	5	2	3	3	2	1	5	3	1	3	2	7	5	4	1	5	6	1	2	6	6	6	6	1	7	6	6	6	6	7	7	2	3	2	5	1
100	PD	F	69	2	67	3	1	4	5	1	4	5	1	6	5	5	6	6	1	5	6	1	6	3	1	6	2	2	1	6	1	3	6	6	4	6	1	6	6	5	3	1	1	6	6	3	3	1	1
100	PD	M	77	10	67	5	1	7	3	1	3	5	1	5	4	7	7	3	1	4	3	1	5	5	7	2	1	1	1	4	1	3	5	6	2	4	1	7	5	6	6	2	4	6	3	5	1	5	7
100	PD	F	61	10	51	3	1	2	4	1	6	4	1	6	1	3	6	1	1	4	3	1	4	4	6	1	3	1	1	5	1	1	7	6	1	4	1	7	3	4	4	4	2	7	6	7	1	1	3
100	PD	F	67	1	66	5	1	5	6	2	7	5	1	3	1	7	7	5	1	3	7	1	6	5	5	3	5	1	1	3	1	1	1	7	4	6	1	7	3	3	7	2	5	7	4	7	1	3	5
100	PD	F	75	16	59	3	1	3	2	3	3	3	1	3	2	5	4	1	1	2	7	3	4	6	5	4	5	2	4	2	1	4	1	6	4	4	1	7	4	4	4	1	7	3	4	5	2	1	4
100	PD	M	85	8	77	3	4	3	5	1	6	6	1	5	1	5	5	1	1	3	4	3	5	3	5	4	4	3	2	5	1	4	4	5	3	5	2	5	5	3	2	5	5	6	2	4	2	2	3
100	PD	F	45	12	33	3	1	2	5	1	2	4	1	7	1	3	4	2	2	5	5	1	3	3	6	1	5	1	3	4	1	1	1	5	4	3	1	5	4	6	4	3	3	5	4	6	1	3	2
57	PD	M	46	4	42	5	1	4	4	2	3	4	1	3	2	5	5	3	1	4	5	2	3	4	3	2	4	2	2	4	2	2	2	5	5	3	1	4	4	2	2	3	5	6	4	4	3	5	4
100	PD	M	62	9	53	3	1	3	5	1	5	3	1	5	2	5	5	3	1	3	3	1	4	3	5	3	2	1	1	3	1	1	1	4	3	2	1	5	4	2	4	3	4	6	2	4	1	2	2
100	PD	F	58	2	56	3	1	6	6	2	6	3	1	7	1	1	7	6	1	2	7	4	7	4	7	1	7	1	1	4	1	1	1	1	4	4	1	7	4	1	7	1	1	7	1	7	1	1	7
100	PD	F	52	3	49	3	1	4	3	1	5	4	1	7	4	4	4	4	1	7	3	2	3	3	7	1	4	2	2	4	1	2	6	6	5	3	1	7	7	4	5	4	3	7	5	4	1	2	2
100	PD	M	70	6	64	3	1	3	2	1	5	5	1	4	5	6	7	1	1	1	2	1	7	6	7	1	2	1	1	4	1	1	7	5	2	3	1	7	6	7	7	1	5	7	3	3	1	1	4
100	PD	M	72	1	71	3	2	2	2	3	3	2	1	3	3	2	3	2	1	3	2	3	3	3	4	1	2	2	2	2	2	2	3	2	2	2	2	3	3	3	2	3	2	4	4	2	2	2	2
100	PD	M	74	9	65	5	1	4	4	2	3	5	1	5	2	2	3	1	1	3	4	2	5	3	6	1	2	3	3	5	1	4	6	4	4	2	1	6	4	6	2	4	5	7	5	4	2	3	1
100	PD	F	65	4	61	2	1	7	7	1	7	5	1	6	1	7	7	5	1	5	7	1	5	1	7	1	5	1	1	7	1	2	1	7	4	7	1	7	7	5	7	1	2	7	5	7	1	1	1
100	PD	F	69	5	64	2	1	7	6	1	6	4	1	5	2	4	5	2	1	6	6	1	6	4	6	2	6	1	2	5	1	2	2	7	5	4	1	1	4	4	5	2	3	7	2	6	1	5	5
100	PD	M	52	2	50	5	1	6	5	4	4	6	2	7	1	4	7	1	1	4	7	4	4	4	6	1	7	2	5	7	1	4	1	6	5	6	1	7	7	3	4	4	5	7	3	7	1	1	1
73	PD	F	55	11	44	3	1	5	6	2	3	4	1	6	2	3	3	2	1	3	5	4	4	3	6	1	6	2	4	5	1	1	1	6	4	3	1	6	3	3	3	4	4	6	4	5	2	3	2
100	PD	M	66	12	54	2	1	5	6	1	6	5	1	4	6	4	6	1	1	3	4	3	5	5	6	4	5	2	1	5	1	2	2	4	3	5	1	6	4	5	6	2	4	7	3	6	1	1	1
100	PD	M	66	9	57	3	1	5	4	1	4	5	1	4	5	6	4	4	1	2	3	1	5	4	6	4	3	1	3	4	2	4	6	6	5	5	1	6	6	4	6	4	1	6	4	2	1	5	4
100	PD	F	67	3	64	3	2	2	6	1	7	6	1	7	2	4	5	2	2	2	6	1	6	4	6	1	7	1	6	7	2	3	1	6	2	6	1	6	6	6	6	6	2	6	3	7	1	1	6
100	PD	F	46	1	45	5	1	2	3	2	7	3	1	7	2	5	7	2	1	3	2	1	7	7	7	3	3	3	1	3	1	3	3	3	1	1	1	7	7	6	6	1	5	7	5	3	1	1	3
100	PD	M	75	2	73	3	1	4	3	1	4	4	1	6	1	5	5	1	1	3	4	1	5	4	5	3	3	1	1	5	1	3	3	5	5	4	1	6	5	4	5	3	4	7	4	6	1	1	1
100	PD	M	64	7	57	8	2	6	4	2	5	5	5	3	3	5	5	3	1	1	4	4	4	5	6	4	2	2	3	5	3	4	2	2	3	2	1	3	3	2	5	2	4	1	2	5	2	2	1
100	PD	M	77	1	76	3	2	1	2	2	3	2	2	4	2	3	6	3	3	4	4	3	6	6	6	5	5	1	1	3	2	4	5	6	4	4	1	6	5	5	7	3	2	7	5	3	2	2	2
100	PD	M	78	1	77	3	1	2	4	2	5	2	4	6	4	7	6	6	1	4	3	1	6	5	6	4	4	1	2	4	2	4	5	6	3	3	1	5	5	6	7	5	3	6	5	3	1	1	3
63	PD	M	66	19	47	5	1	4	3	4	5	5	1	4	1	5	6	6	1	6	4	1	4	4	5	5	1	2	5	2	2	2	4	4	4	3	2	5	4	4	4	2	3	6	4	4	2	4	4
100	PD	F	76	4	72	2	1	4	4	2	4	2	1	5	3	3	4	3	1	3	3	3	3	5	7	3	2	1	4	5	1	4	7	4	4	1	1	6	6	7	5	2	2	7	5	2	2	1	5
100	PD	M	62	14	48	5	1	5	5	1	5	4	1	6	2	6	6	6	1	4	5	1	6	4	6	6	3	1	5	5	2	3	3	6	3	5	1	6	3	4	6	2	3	6	5	6	2	2	2
100	PD	M	55	6	49	3	1	5	4	2	5	3	1	4	2	2	6	5	1	2	4	3	6	4	7	2	4	1	2	7	2	2	3	7	2	6	1	6	2	6	6	2	5	7	1	4	1	1	1
100	PD	M	63	20	43	2	1	5	5	1	6	4	1	5	2	5	3	4	1	6	2	1	6	3	7	3	5	1	2	6	2	5	3	5	2	6	2	5	3	5	5	2	3	7	3	6	3	6	2
100	PD	F	58	12	46	2	1	7	3	1	2	4	1	7	3	4	4	1	1	7	7	4	5	4	7	1	3	4	7	2	7	1	7	4	3	3	1	7	7	7	7	4	1	7	4	5	1	2	2
100	PD	F	74	2	72	2	1	4	5	2	4	7	1	3	1	3	2	1	1	3	3	1	3	1	3	1	4	1	2	4	1	1	1	5	3	4	1	5	4	2	2	2	3	6	3	5	1	1	1
100	PD	M	70	14	56	3	1	2	2	1	2	2	1	5	2	2	2	7	2	3	2	1	2	2	7	3	1	2	4	1	1	1	1	1	2	1	1	6	2	3	2	3	1	6	5	3	2	3	1
100	PD	F	72	5	67	3	7	7	6	1	7	7	1	3	3	1	1	1	1	1	5	1	7	7	1	7	7	1	7	6	1	1	1	7	7	1	1	7	7	1	1	1	7	7	1	7	1	4	1
100	PD	F	76	13	63	5	1	5	5	2	6	4	1	4	1	6	6	2	1	5	4	1	5	4	7	1	4	1	1	6	1	4	2	3	2	4	1	7	5	4	4	2	5	7	4	7	1	2	5
100	PD	M	48	6	42	5	3	5	5	4	4	5	2	4	1	2	6	2	1	2	6	4	4	3	7	2	7	4	4	5	2	2	1	2	3	4	2	5	5	2	2	2	6	7	2	7	2	2	2
100	PD	M	69	1	68	5	1	2	3	2	3	4	3	5	4	3	3	3	2	3	4	2	3	5	5	2	5	2	3	6	2	3	3	5	5	6	2	4	3	6	5	3	5	5	6	4	2	2	5
100	PD	M	66	5	61	2	1	6	6	3	5	4	1	5	1	5	5	1	1	1	6	4	5	4	6	1	6	1	1	6	1	4	1	5	1	6	1	7	4	1	5	1	3	6	1	6	1	3	1
100	PD	F	60	3	57	3	1	4	3	2	6	3	1	6	4	3	6	3	1	5	4	2	6	4	6	1	3	2	1	5	1	3	5	5	2	5	1	6	4	5	4	2	4	6	5	3	1	2	2
100	PD	M	73	1	72	3	2	4	4	2	3	5	2	3	2	5	3	1	2	2	4	4	3	3	5	3	5	2	3	5	2	4	3	6	3	6	2	5	3	4	3	3	1	5	1	3	1	1	2
100	PD	M	76	13	63	5	2	4	5	1	6	6	1	6	1	7	5	1	1	6	2	1	6	4	6	4	1	1	4	4	3	4	5	7	2	5	1	6	2	7	6	1	4	7	2	6	2	4	2
100	PD	M	72	7	65	3	2	3	4	3	5	5	1	3	1	3	4	2	1	2	5	1	4	3	4	5	5	1	4	4	1	3	2	4	4	5	2	5	4	2	3	1	5	5	5	5	1	2	2
100	PD	M	67	10	57	3	1	6	6	1	6	6	1	7	6	4	5	1	1	5	5	1	5	4	6	1	4	1	6	7	1	3	2	5	4	6	1	6	5	5	5	2	3	6	2	5	2	3	5
100	PD	M	76	18	58	2	1	7	7	1	7	4	1	6	1	4	7	2	1	1	7	1	5	6	6	1	7	1	1	7	1	1	1	6	1	7	1	7	5	2	7	1	2	7	1	7	4	1	1
100	PD	M	75	9	66	5	1	5	4	1	5	5	1	7	4	7	5	1	1	3	2	1	5	1	5	1	3	1	3	7	1	1	3	7	1	4	1	7	4	7	7	1	7	7	4	4	1	4	1
100	PD	M	65	8	57	3	1	2	4	1	6	5	1	7	1	5	7	2	1	2	5	1	4	4	6	1	4	1	2	6	1	1	2	7	4	4	1	7	7	4	5	2	2	7	4	6	1	2	4
100	PD	F	68	3	65	3	1	2	6	1	2	6	1	5	1	1	3	1	1	2	6	1	3	5	3	1	6	1	3	5	1	1	1	3	5	5	1	6	6	1	4	4	3	7	5	7	1	2	1
100	PD	F	51	1	50	3	1	4	3	4	3	1	1	7	5	3	5	7	1	4	2	4	3	1	7	1	2	2	1	6	1	3	5	5	2	3	1	7	7	4	4	1	1	7	4	4	1	1	1
100	PD	M	65	3	62	2	1	1	7	1	7	7	1	7	1	7	7	7	1	1	7	1	1	7	1	1	7	1	7	7	1	7	1	7	7	1	1	7	1	1	1	7	7	7	7	7	1	7	1
100	PD	M	57	13	44	3	1	7	7	1	7	7	1	6	1	7	7	1	1	1	7	1	7	1	7	2	7	1	1	7	1	2	1	7	1	7	1	7	2	1	7	1	6	7	1	7	1	1	1
100	PD	F	80	4	76	1	1	7	1	1	7	1	1	7	7	7	7	7	1	7	2	7	7	7	7	1	1	1	1	1	1	1	7	7	1	1	1	7	7	7	7	1	6	7	1	1	1	2	7
100	PD	M	78	4	74	8	4	6	6	2	2	5	5	6	1	6	5	2	1	1	6	4	6	4	6	6	5	1	2	5	5	3	2	2	5	4	2	2	3	2	2	3	4	2	2	2	6	2	6
57	PD	F	63	2	61	3	1	4	3	1	7	5	1	4	1	7	7	3	1	4	4	1	7	4	7	1	4	1	1	7	1	3	4	4	1	3	1	7	7	4	4	1	3	7	4	4	1	4	2
100	PD	F	59	12	47	3	1	5	5	1	4	7	1	7	1	7	7	1	1	5	6	1	7	7	7	1	4	1	1	5	1	3	5	6	4	5	1	7	6	6	6	5	5	7	4	7	1	1	1
63	PD	M	70	5	65	3	1	2	3	2	4	3	1	5	4	4	3	1	1	5	2	2	3	3	4	1	2	2	4	4	1	1	6	5	3	3	2	3	5	6	4	4	4	4	6	4	2	2	4
100	PD	M	59	10	49	5	4	5	4	3	4	2	1	6	2	4	5	6	1	3	4	3	5	5	6	2	4	5	2	5	2	2	3	5	3	5	2	6	6	5	5	2	4	6	3	5	1	2	5
100	PD	F	61	1	60	3	4	4	1	6	7	6	1	7	4	1	7	1	1	5	4	6	7	5	7	1	1	1	1	7	1	1	7	3	4	7	1	7	7	1	5	5	7	7	4	4	1	5	1
63	PD	M	69	10	59	3	1	3	2	1	3	4	1	5	1	3	3	1	1	7	3	2	3	5	7	2	1	1	2	4	7	2	3	4	4	1	1	6	5	6	3	4	3	7	3	5	1	1	2
100	PD	M	79	12	67	3	1	4	2	1	5	5	1	5	4	2	5	3	1	5	5	2	6	5	6	3	3	1	2	3	2	3	4	6	3	3	1	7	6	7	5	2	3	7	2	3	2	4	5
100	PD	M	65	4	61	3	1	3	3	1	4	6	1	4	1	6	6	1	1	1	4	1	6	3	7	1	4	1	1	6	1	1	2	7	3	5	1	7	5	3	7	1	5	7	3	6	1	1	1
63	PD	F	60	7	53	5	1	7	6	1	6	7	1	7	3	6	7	1	1	6	7	1	6	1	7	1	6	1	1	5	1	1	6	5	1	6	1	7	7	3	6	1	6	7	6	7	1	4	1
57	PD	F	81	4	77	5	1	5	5	3	6	6	1	4	1	3	6	1	1	3	5	2	6	2	6	4	5	2	2	5	1	1	1	2	3	4	1	6	2	4	3	3	5	6	2	5	3	3	1
100	PD	M	77	9	68	5	1	1	1	1	1	5	4	4	4	4	3	1	1	4	1	1	2	1	4	3	1	1	4	2	2	4	5	5	5	2	1	3	4	4	5	5	5	5	4	4	1	2	2
100	PD	F	73	3	70	7	1	5	2	2	2	6	1	3	1	1	5	1	1	2	5	1	4	6	7	5	6	1	1	6	1	5	5	2	6	3	1	6	6	2	2	2	1	6	5	6	1	2	5
100	PD	F	79	5	74	8	1	3	2	1	4	6	1	4	4	4	5	1	1	5	4	1	6	5	7	5	5	1	1	4	1	2	4	5	2	5	1	7	5	4	4	5	4	7	4	4	1	1	1
100	PD	M	67	14	53	3	3	3	3	7	6	1	1	7	6	3	7	7	1	7	7	7	3	7	7	7	7	7	7	7	1	1	3	3	3	7	1	7	7	3	4	1	7	7	7	7	1	1	1
100	PD	F	46	1	45	6	1	7	3	5	1	7	1	7	7	7	7	1	1	7	4	4	6	1	7	5	4	4	7	7	1	4	4	4	7	7	1	7	7	7	1	4	7	7	1	4	1	1	1
63	PD	F	51	1	50	2	1	5	7	1	4	5	1	7	1	6	6	2	1	7	6	1	4	2	7	1	6	1	5	3	2	1	6	6	7	6	1	7	7	1	7	2	3	6	7	7	1	2	1
100	PD	F	62	8	54	3	2	5	5	3	2	2	1	5	3	4	6	3	1	2	2	1	1	1	7	5	3	1	7	7	1	5	4	7	6	7	1	7	2	4	3	7	4	1	2	2	1	2	1
63	PD	F	66	2	64	3	3	4	3	5	4	4	2	6	2	2	4	4	1	6	6	6	2	2	5	2	6	5	2	6	1	1	1	5	5	6	2	7	6	2	2	6	4	6	4	6	4	6	4
100	PD	F	69	3	66	3	1	2	6	2	2	6	1	5	2	4	4	1	1	7	2	2	3	3	7	2	2	2	7	4	1	1	2	6	6	6	1	6	7	2	2	5	7	7	3	3	1	6	1
100	PD	F	68	8	60	5	1	7	6	2	6	7	1	6	1	3	6	1	1	6	6	3	3	2	7	2	6	2	3	6	1	2	2	4	3	6	1	7	6	2	2	3	6	6	4	6	2	4	2
100	PD	F	57	1	56	5	5	4	1	1	3	6	2	4	6	5	5	5	1	4	1	5	2	6	7	4	1	5	7	7	1	1	6	5	6	1	1	7	5	6	6	6	7	7	4	1	1	1	6
100	PD	F	52	4	48	5	1	6	6	4	3	7	5	2	2	4	4	1	1	1	7	3	7	1	7	1	4	3	6	6	1	5	1	4	5	3	1	7	2	2	2	7	5	7	2	6	2	3	1
100	PD	F	68	22	46	3	1	6	3	2	3	3	1	2	5	4	5	3	1	1	3	2	4	2	7	4	3	3	4	4	1	5	6	3	6	3	1	6	2	7	7	6	4	6	3	3	2	5	6
57	PD	F	79	7	72	3	1	4	5	3	7	7	1	6	1	6	7	1	1	5	5	2	6	2	7	2	6	1	1	6	2	2	2	5	2	6	1	6	6	5	6	2	7	7	4	7	1	2	5
100	PD	F	75	2	73	5	1	6	5	2	2	7	1	5	2	3	6	1	1	5	4	1	5	4	6	2	5	2	2	5	1	2	3	6	4	4	1	7	2	4	3	4	6	7	4	5	1	3	3
100	PD	M	52	15	37	3	2	4	5	1	4	2	1	6	1	4	6	2	1	5	5	1	6	4	7	1	7	1	2	4	1	3	1	5	3	3	1	7	4	4	3	2	3	7	3	6	1	4	2
100	PD	F	62	9	53	3	1	4	4	3	2	5	1	7	6	5	7	3	2	5	3	3	6	2	3	2	3	3	5	6	2	1	3	1	6	4	2	6	6	3	6	7	2	5	5	4	2	2	2
57	PD	M	54	2	52	3	1	5	6	1	4	3	1	5	1	4	4	7	1	3	7	1	4	4	4	1	6	2	5	7	1	3	1	6	4	7	1	7	7	1	3	4	1	7	1	7	1	6	4
100	PD	M	69	14	55	3	1	4	4	3	2	5	1	5	4	3	4	1	1	5	3	3	3	1	2	1	4	1	2	5	1	1	5	2	5	3	1	6	4	4	5	4	4	2	2	4	1	3	1
100	PD	M	65	1	64	5	1	2	3	1	6	3	1	4	3	7	7	4	1	5	1	1	6	4	7	3	1	1	1	6	1	6	7	7	6	2	1	7	3	7	7	1	5	7	6	2	1	1	4
100	PD	M	73	7	66	3	1	6	4	2	6	6	1	5	2	5	6	1	1	5	2	2	3	3	6	3	4	1	3	5	1	2	4	2	5	5	1	7	5	6	3	2	2	7	2	3	1	2	2
100	PD	F	67	8	59	5	1	5	7	3	3	7	1	4	1	5	4	1	1	4	4	5	3	2	7	3	5	3	5	7	1	3	3	4	5	6	1	6	3	1	3	6	5	6	4	6	2	4	1
100	PD	M	69	9	60	5	3	4	3	4	4	5	2	5	2	3	5	3	2	2	3	3	3	2	3	4	3	2	3	2	3	3	3	5	5	5	3	5	3	3	3	5	3	4	6	3	3	3	2
100	PD	M	65	10	55	3	1	3	4	1	4	5	2	6	6	7	7	1	1	5	2	1	6	6	6	4	1	1	2	3	1	4	6	7	6	2	1	7	4	7	7	2	4	7	4	5	1	1	5
100	PD	F	57	0	57	3	1	4	4	3	6	5	1	5	4	3	5	1	1	4	3	1	6	3	5	1	3	1	4	6	1	1	1	5	4	3	1	6	4	3	3	3	4	6	4	4	1	3	1
100	PD	M	69	24	45	2	1	4	5	3	3	6	1	4	1	5	5	2	1	1	3	2	3	3	5	3	4	1	2	4	2	4	3	4	5	4	5	6	6	4	5	3	4	7	2	7	2	5	2
100	PD	F	69	5	64	3	1	4	5	3	7	7	2	5	2	6	5	1	1	2	4	2	5	3	7	3	4	1	4	6	3	4	2	6	3	3	1	6	3	4	7	2	5	6	5	5	1	3	2
100	PD	F	70	9	61	5	1	3	3	2	7	7	1	7	4	6	7	1	1	5	5	1	7	4	7	1	5	1	2	2	1	1	2	7	2	2	1	7	7	5	7	2	3	7	5	5	1	2	1
100	PD	M	70	6	64	3	1	1	3	1	6	6	1	3	1	5	5	1	1	2	4	1	6	2	6	2	1	1	4	6	1	1	1	6	2	5	1	7	6	5	6	1	3	7	5	5	1	1	1
100	PD	F	60	19	41	3	1	4	5	1	6	6	1	3	1	3	5	1	1	1	6	2	5	2	7	2	6	1	1	3	1	4	1	5	2	6	1	6	3	2	6	2	3	6	2	7	1	5	1
80	PD	M	78	1	77	5	1	4	3	2	6	6	1	6	5	6	6	1	1	3	2	2	2	2	6	2	2	1	4	6	2	3	6	6	3	5	1	7	5	6	5	2	3	7	2	2	1	4	3
100	PD	F	62	12	50	2	1	7	7	1	7	7	1	7	1	5	7	5	1	1	7	1	7	4	7	1	1	1	1	4	1	1	1	5	4	4	1	7	7	1	7	1	4	7	1	7	1	1	1
100	PD	F	64	6	58	5	1	6	6	1	6	5	1	7	2	6	7	4	1	4	4	1	6	4	7	1	5	1	3	3	1	1	4	6	1	4	1	7	6	5	7	5	3	7	5	6	1	4	6
100	PD	F	55	4	51	2	1	4	1	7	7	2	1	6	1	6	6	2	1	5	4	1	5	5	7	1	1	1	2	7	1	4	3	7	5	5	1	6	6	2	6	3	3	7	2	7	1	1	1
100	PD	F	72	15	57	5	1	3	2	2	4	5	2	3	1	3	3	1	1	3	3	1	3	4	5	3	4	1	3	4	1	1	1	4	2	2	1	4	3	3	3	3	4	5	2	4	1	4	1
100	PD	F	70	7	63	3	1	5	4	1	6	6	5	4	1	6	5	1	1	4	4	1	7	6	6	6	4	1	1	7	1	5	4	6	1	7	1	6	7	6	7	1	7	7	6	6	1	7	1
100	PD	F	76	11	65	5	1	5	4	2	7	6	1	7	1	4	7	1	1	5	5	1	6	4	7	1	7	1	6	7	1	1	1	4	4	4	1	7	7	2	6	1	5	7	4	6	2	6	2
100	PD	M	74	4	70	5	1	4	5	1	7	7	1	6	2	7	7	1	1	4	4	1	6	4	7	3	3	1	1	5	1	3	3	7	3	1	1	7	5	4	6	1	5	7	5	6	1	1	5
100	PD	M	62	14	48	3	1	5	2	5	4	6	2	6	6	2	6	7	1	5	4	5	5	2	6	4	1	3	1	1	2	6	2	7	3	1	1	6	6	7	7	1	6	3	3	2	5	2	6
100	PD	M	63	1	62	5	1	4	6	2	6	6	2	5	1	4	4	1	1	4	5	2	6	6	7	3	3	2	1	4	1	1	3	6	2	2	2	6	4	4	4	2	6	6	4	6	1	1	2
100	PD	F	62	6	56	3	1	4	5	5	6	6	1	6	1	5	5	1	1	4	6	3	5	3	5	1	6	4	1	7	1	1	1	6	2	6	1	7	5	6	4	2	3	6	4	6	2	2	1
100	PD	F	61	4	57	3	1	3	5	2	4	5	1	5	1	3	6	2	1	4	3	1	5	5	6	1	4	1	4	6	1	1	1	5	4	2	1	6	3	3	4	4	1	6	4	5	1	1	3
100	PD	M	71	3	68	3	1	1	2	1	2	4	1	5	4	3	5	4	1	5	2	3	6	2	5	3	3	2	5	5	1	2	5	4	5	2	1	6	5	5	4	3	4	6	6	4	1	3	4
87	PD	F	60	10	50	4	2	4	5	2	3	4	2	5	1	6	4	2	2	3	6	3	4	4	6	2	5	4	4	6	3	3	3	4	4	3	4	4	4	3	6	5	4	4	3	6	4	4	5
100	PD	M	66	2	64	5	1	3	4	1	4	3	1	3	1	4	7	2	1	2	6	1	6	2	6	4	7	1	1	7	1	4	1	7	1	3	1	6	3	3	7	1	5	6	2	7	1	1	2
100	PD	M	68	6	62	8	1	3	3	1	5	4	1	4	4	7	7	2	1	2	2	1	7	5	7	6	2	1	1	4	1	1	5	7	1	4	1	7	6	5	7	2	2	7	2	5	1	1	2
100	PD	M	67	11	56	3	1	2	2	1	7	1	1	4	4	1	3	7	1	1	1	1	4	2	7	7	7	1	2	4	1	1	1	7	3	4	1	7	1	7	7	1	1	7	1	4	1	1	7
100	PD	F	60	1	59	5	1	1	3	1	7	4	1	5	1	4	5	1	1	4	5	3	4	3	7	1	5	2	2	7	1	1	2	5	2	2	5	7	4	2	2	3	6	7	6	6	4	1	1
100	PD	M	64	3	61	3	1	4	4	2	3	3	1	5	1	4	5	3	1	3	3	2	4	3	4	3	3	2	1	4	1	3	3	3	2	3	1	4	3	2	3	1	2	3	2	3	1	2	2
100	PD	F	74	2	72	3	1	1	5	2	6	6	3	6	2	6	7	2	1	2	6	2	5	5	2	7	6	1	2	6	2	3	2	6	3	5	1	7	6	4	7	2	3	7	5	6	1	5	1
100	PD	F	57	16	41	3	1	5	5	1	5	6	1	7	1	4	6	1	1	6	4	1	6	1	7	1	5	1	1	5	1	5	5	3	3	7	1	5	5	4	5	2	4	7	7	7	1	1	1
100	PD	F	69	10	59	2	1	4	4	2	5	6	1	5	1	2	2	1	1	2	7	1	3	3	5	1	3	2	4	7	1	1	1	7	7	7	1	7	7	1	2	2	6	7	4	7	3	3	1
100	PD	M	69	3	66	3	5	7	6	1	6	6	1	6	1	7	7	4	1	5	6	1	6	7	7	1	4	1	6	7	1	5	5	5	4	6	1	7	5	7	7	1	5	7	1	7	1	1	4
63	PD	F	48	4	44	2	1	1	4	1	6	4	1	6	1	4	6	1	1	1	4	1	5	4	7	1	1	1	1	4	2	2	1	7	4	5	1	7	4	1	4	2	3	7	1	7	1	4	1
100	PD	F	55	1	54	3	1	2	7	2	2	3	1	7	3	5	6	1	1	1	1	1	5	1	3	1	5	2	5	6	1	1	3	6	6	3	1	6	7	1	3	5	2	7	7	7	2	1	7
100	PD	F	57	23	34	2	1	3	1	1	2	2	1	4	1	5	4	1	1	2	1	1	4	4	5	1	2	1	2	3	2	2	2	7	2	2	1	7	7	6	4	1	4	6	3	4	1	2	1
100	PD	F	60	12	48	3	1	5	3	3	3	4	1	7	3	2	5	1	1	4	3	4	4	1	4	3	2	4	4	5	2	3	5	4	4	6	1	5	4	3	1	2	1	5	1	3	7	6	1
100	PD	F	57	1	56	3	1	7	6	4	6	6	1	5	1	3	6	1	1	3	7	1	6	1	7	1	7	3	1	6	1	3	1	5	2	4	1	6	4	1	6	2	3	7	5	7	1	3	2
100	PD	M	79	27	52	2	4	5	2	2	2	1	3	6	4	1	4	7	1	6	4	6	7	7	7	1	3	1	5	4	3	1	3	3	2	1	1	7	7	4	1	7	1	7	2	7	1	1	7
100	PD	M	53	1	52	3	1	7	7	4	6	7	1	4	1	6	7	1	1	5	6	3	7	5	7	5	6	4	1	6	1	2	4	7	5	5	1	6	2	2	7	2	6	6	2	7	4	2	2
100	PD	F	74	10	64	5	1	5	2	5	2	1	1	6	5	1	5	7	1	4	1	7	5	6	7	1	1	4	1	1	1	5	5	2	3	1	1	7	6	7	1	4	1	7	5	4	1	1	2
100	PD	F	80	10	70	5	1	3	4	2	5	7	2	5	1	3	6	1	1	3	3	1	6	2	6	1	5	1	1	5	1	2	2	5	3	3	1	6	2	3	5	2	2	6	3	6	2	2	1
100	PD	F	69	1	68	3	4	4	2	1	5	5	1	7	1	4	7	1	5	5	4	2	7	6	7	1	2	1	1	6	5	4	2	6	1	6	1	6	6	3	6	1	6	6	5	5	1	1	6
100	PD	M	49	1	48	3	1	3	3	4	6	4	2	6	2	3	5	2	1	4	6	4	5	2	6	3	6	2	2	6	1	3	4	4	1	5	1	5	4	5	5	2	3	5	3	6	3	2	3
100	PD	M	86	4	82	5	1	1	4	1	7	7	1	7	1	5	6	1	1	1	7	1	7	6	7	1	7	1	7	7	2	1	1	7	2	7	1	7	7	5	7	1	7	7	1	7	1	7	7
63	PD	F	77			3	1	1	1	1	1	2	1	1	7	1	7	1	1	7	1	1	7	7	7	1	1	1	7	7	1	1	7	1	7	7	7	7	1	7	7	1	7	7	7	1	7	1	7
100	PD	F	58	18	40	3	1	6	5	1	6	5	1	7	1	3	4	1	1	7	6	1	6	6	7	1	7	1	5	5	1	1	1	7	1	6	1	7	6	5	7	5	3	7	7	7	1	1	1
100	PD	F	65	3	62	2	1	7	7	1	7	7	1	1	1	7	7	1	1	1	7	1	7	6	7	7	7	1	1	7	1	7	1	7	1	7	1	7	7	1	7	1	7	7	1	7	1	1	1
57	PD	M	80	1	79	5	1	3	1	1	3	5	5	7	2	5	5	4	1	4	5	1	4	2	4	1	7	1	3	6	1	2	1	3	2	6	1	5	5	1	5	3	5	7	4	7	1	2	1
100	PD	M	65	10	55	5	1	5	5	1	6	4	1	5	2	2	5	2	1	2	4	1	5	5	6	4	4	1	1	5	1	3	1	7	2	2	1	7	4	4	6	1	4	7	2	5	1	1	3
100	PD	M	75	11	64	6	1	3	3	1	4	6	1	4	4	5	4	1	1	4	5	1	4	3	6	3	4	1	5	6	1	4	4	3	3	4	1	6	3	4	6	4	7	7	4	5	1	5	1
100	PD	F	59	15	44	3	1	4	7	1	4	6	1	5	1	3	6	1	1	4	5	1	4	3	7	2	6	1	2	6	1	6	1	4	4	5	1	5	5	3	5	3	6	7	3	7	1	3	1
100	PD	M	69	9	60	5	1	1	3	1	7	4	1	5	3	6	6	4	1	6	3	3	4	4	5	1	2	1	5	4	1	1	5	6	5	1	5	6	4	7	5	4	7	6	7	5	1	5	7
100	PD	M	61	5	56	3	1	6	1	2	6	2	3	4	2	4	6	2	6	2	2	4	6	6	7	4	4	6	1	3	2	2	5	5	5	2	5	7	4	7	7	3	5	7	4	2	5	6	4
100	PD	F	68	7	61	3	1	4	6	2	6	4	1	4	1	2	6	4	1	4	6	1	7	1	6	6	4	1	1	6	1	5	1	5	1	6	1	7	7	6	6	2	2	7	2	7	1	2	2
100	PD	M	65	5	60	3	2	4	3	1	5	4	1	2	4	5	5	2	6	2	3	2	5	4	6	4	2	3	4	5	1	2	4	5	2	4	1	6	3	4	4	2	3	6	1	3	1	3	2
100	PD	M	78	5	73	3	1	6	7	1	3	6	2	6	4	5	6	1	1	2	5	2	4	4	7	1	3	1	1	6	1	5	4	6	3	3	1	7	6	5	6	2	6	6	3	6	2	2	3
100	PD	M	65	13	52	3	1	5	4	3	6	2	2	6	4	4	5	2	1	3	4	4	5	4	3	4	4	2	1	3	2	3	4	4	3	5	1	6	6	5	4	1	5	6	3	5	1	1	2
100	PD	F	62	15	47	5	1	7	1	3	3	7	1	7	3	3	3	1	1	7	7	1	7	2	7	2	4	1	1	7	1	1	6	2	7	3	1	7	7	1	1	7	4	7	1	4	1	6	4
73	PD	M	58	10	48	6	1	7	3	2	3	3	1	5	1	2	6	2	1	7	3	2	4	2	7	4	4	2	5	7	1	3	2	6	7	4	1	7	4	3	3	5	6	5	1	3	1	2	2
100	PD	F	59	5	54	5	1	4	5	2	3	4	1	5	1	3	4	2	1	3	5	3	4	5	5	2	5	2	4	5	2	2	3	6	4	3	1	5	4	3	5	4	3	6	4	6	2	1	2
100	PD	F	62	9	53	3	1	6	4	4	7	1	1	5	1	3	7	2	1	4	6	3	5	3	2	1	3	1	3	4	1	5	3	5	5	4	6	6	3	4	4	4	3	6	4	5	4	1	5
100	PD	F	68	2	66	2	1	7	1	1	5	1	1	3	1	1	2	7	1	1	1	1	4	1	7	7	1	4	1	4	1	6	5	2	1	5	1	5	1	6	4	1	2	6	1	5	1	1	1
100	PD	M	74	29	45	3	1	4	3	1	4	2	1	3	1	5	3	2	1	2	2	1	3	5	4	3	2	1	3	2	1	2	2	4	2	1	4	4	3	5	4	3	3	5	2	4	1	1	2
100	PD	M	79	27	52	4	2	6	5	3	4	2	4	4	2	5	7	2	4	5	2	2	7	5	7	5	3	4	5	4	3	2	4	1	1	1	1	7	7	4	6	4	1	7	3	6	2	2	5
100	PD	M	69	3	66	5	2	3	4	5	2	7	1	4	4	2	5	1	1	3	4	5	3	5	6	2	3	5	4	3	2	2	3	2	5	3	2	6	4	3	2	3	6	6	4	5	4	3	3
87	PD	F	47	2	45	3	4	5	4	2	5	7	1	6	4	4	4	1	2	6	3	4	4	5	7	1	6	4	5	6	2	1	5	5	5	4	1	6	3	4	6	5	6	6	4	6	4	2	4
100	PD	F	56	18	38	3	1	4	3	2	4	1	1	3	2	2	3	5	1	4	2	2	3	2	5	1	1	2	2	2	1	1	1	4	2	2	1	4	4	5	3	3	2	4	5	2	1	3	3
100	PD	M	66	10	56	5	1	1	7	1	5	2	1	6	5	4	6	5	1	5	3	2	6	4	7	1	4	1	2	4	1	3	6	6	4	3	1	7	5	5	6	4	5	7	6	3	1	3	5
100	PD	M	74	4	70	5	1	6	6	1	6	4	4	6	4	5	4	3	1	4	1	1	4	5	6	5	3	1	4	5	1	4	4	6	5	1	1	6	6	5	5	2	5	6	4	4	1	2	3
63	PD	M	57	4	53	6	2	3	2	2	3	6	2	6	4	4	4	2	3	5	5	4	5	4	4	1	4	2	5	7	3	1	5	6	6	5	3	6	6	5	2	5	5	5	5	4	2	5	1
100	PD	F	56	5	51	5	4	7	6	2	5	7	1	4	1	4	7	1	1	4	5	1	6	5	5	4	6	1	5	6	1	5	1	5	3	7	1	5	4	4	6	4	5	7	3	6	1	4	1
100	PD	F	73	3	70	5	1	3	3	1	3	4	1	3	1	3	3	1	1	3	2	1	3	2	3	1	3	1	1	3	1	2	2	3	1	4	1	3	4	5	4	2	4	4	2	3	1	1	2
57	PD	M	68	8	60	5	7	7	2	1	7	1	7	7	4	3	7	7	1	7	1	1	1	1	7	1	1	1	1	5	1	7	7	7	7	4	1	7	7	7	7	1	7	7	7	4	1	7	7
100	PD	F	46	1	45	4	1	6	5	2	6	6	1	4	4	4	5	1	1	6	4	5	6	4	5	1	3	1	4	5	1	4	6	7	4	4	1	7	5	7	7	1	5	7	4	5	1	2	1
100	PD	M	55	5	50	5	1	4	2	3	7	7	1	7	3	1	7	1	1	3	3	3	4	4	2	4	2	3	1	7	1	1	7	7	1	3	1	4	7	7	3	3	3	7	3	1	1	1	1
100	PD	M	50	1	49	5	1	6	6	3	2	4	1	3	1	3	5	1	1	3	6	4	4	5	6	5	6	4	2	4	1	1	1	2	2	4	1	6	1	1	5	2	3	7	1	7	3	3	3
100	PD	M	68	9	59	3	1	3	2	1	4	3	1	6	1	3	4	3	1	2	2	1	4	4	4	2	2	1	2	4	1	2	5	5	4	4	1	4	3	3	3	2	2	6	2	5	1	1	3
57	PD	F	48	1	47	3	1	1	1	1	1	3	1	7	7	4	7	3	1	7	1	4	7	4	4	1	1	1	5	6	1	2	7	7	7	1	1	7	7	7	4	4	3	7	7	1	1	1	4
100	PD	F	52	10	42	3	2	4	2	3	3	3	1	7	3	1	5	3	1	4	4	2	7	3	7	1	3	1	2	6	1	1	4	5	4	4	1	7	7	4	1	1	3	7	6	3	1	2	2
57	PD	M	75	10	65	5	1	5	3	3	6	6	2	4	1	3	6	2	2	6	3	2	6	5	5	4	3	2	5	7	2	5	5	4	3	7	2	4	4	4	3	5	7	4	4	6	2	3	5
100	PD	F	60	6	54	3	1	7	5	1	6	4	1	5	7	6	6	4	1	5	6	1	6	3	6	1	6	1	6	5	1	1	1	5	2	4	1	6	6	4	6	2	4	7	5	5	1	4	3
100	PD	F	53	5	48	3	3	4	4	2	6	4	1	7	4	4	4	3	2	3	5	1	6	4	2	1	4	3	4	6	2	2	4	5	5	4	1	6	4	6	6	3	2	5	5	4	2	5	3
100	PD	F	50	10	40	5	1	4	6	2	6	6	1	4	1	4	5	1	1	3	6	2	5	2	7	1	6	2	2	6	1	2	1	6	2	4	1	6	5	1	6	2	5	7	4	6	1	4	1
100	PD	M	69	11	58	3	1	6	6	2	6	3	1	4	1	4	5	1	1	4	5	1	7	4	4	1	4	1	1	4	1	3	3	7	1	6	1	7	1	3	3	1	4	7	1	7	1	2	1
100	PD	F	52	3	49	3	1	5	3	1	4	3	1	7	1	2	6	5	1	5	3	1	7	4	7	1	4	1	3	4	1	1	4	6	2	2	1	7	7	3	4	2	2	7	1	4	1	1	4
57	PD	F	79	3	76	2	1	6	5	1	7	6	1	5	1	7	7	1	1	5	5	1	6	6	7	1	6	1	1	6	1	5	5	7	1	7	1	7	5	7	7	1	6	7	5	6	1	1	1
100	PD	M	64	20	44	2	1	4	5	1	3	4	1	6	2	6	4	4	2	3	6	2	3	2	6	2	4	1	1	7	1	2	2	5	3	6	1	6	4	1	5	1	3	6	1	4	1	3	6
100	PD	F	70	16	54	2	1	3	3	1	2	2	1	7	5	2	5	2	1	3	3	1	2	3	5	1	4	1	4	3	1	4	1	5	3	2	5	6	6	4	4	3	2	6	5	5	1	2	2
100	PD	F	69	9	60	3	1	6	4	1	7	5	1	7	1	7	7	1	1	1	4	1	7	2	7	1	4	1	1	5	1	1	1	7	1	4	1	7	7	7	7	1	4	7	4	4	1	1	1
100	PD	M	65	4	61	5	1	3	5	1	3	6	1	7	1	4	6	1	1	6	7	2	4	4	5	1	7	1	2	5	1	1	1	7	2	6	1	1	6	1	5	2	4	7	5	7	1	2	1
100	PD	F	67	6	61	3	1	4	4	2	4	7	1	3	2	3	4	1	3	4	4	2	2	3	3	4	5	2	4	6	2	2	2	3	5	5	2	2	3	3	2	5	3	6	3	6	3	4	1
100	PD	F	48	6	42	5	2	5	3	1	7	6	2	7	5	3	6	1	1	4	2	2	7	5	7	1	2	1	2	7	1	1	6	7	3	2	1	6	6	7	5	1	4	6	2	3	1	1	1
100	PD	M	72	12	60	3	2	4	7	2	4	7	1	6	1	2	2	1	1	2	6	3	3	2	1	3	5	3	2	5	1	2	2	4	3	6	1	5	5	3	2	3	3	7	1	5	1	4	2
100	PD	F	62	10	52	3	1	6	5	1	5	2	1	6	7	2	7	3	1	2	5	1	7	4	6	1	4	1	5	5	1	4	2	4	1	5	1	7	7	4	3	1	2	7	4	6	1	3	1
100	PD		1			1	4	4	2	7	3	1	7	1	4	7	1	1	7	4	1	7	4	5	1	7	1	7	7	1	1	1	4	4	1	1	7	7	4	4	1	7	7	7	7	1	1	1	7
[truncated: 46 more columns]
